# Supplementary material for: Fingerprinting Soybean Germplasm and Its Utility in Genomic Research
Source: PubMed Central journal article supplement (PMC4592982; doi:10.1534/g3.115.019000), 2015-07-28
Supplement: supp_g3.115.019000_019000SI.pdf [file supp_g3.115.019000_019000SI.pdf]

**Fingerprinting soybean germplasm and its utility in genomic research**

Qijian Song<sup>\*</sup>, David L. Hyten<sup>\*1</sup>, Gaofeng Jia<sup>\*</sup>, Charles V. Quigley<sup>\*</sup>, Edward W. Fickus<sup>\*</sup>,

Randall L. Nelson<sup>§</sup> and Perry B. Cregan<sup>\*</sup>

<sup>\*</sup> United States Department of Agriculture, Agricultural Research Service, Soybean Genomics and Improvement Lab., Beltsville, Maryland, USA

<sup>§</sup> United States Department of Agriculture, Agricultural Research Service, Soybean/Maize Germplasm, Pathology and Genetics Research Unit and Department of Crop Sciences, University of Illinois, Urbana, Illinois, USA

<sup>1</sup> Pioneer Hi-Bred International Inc, Johnston, Iowa, USA.

**URL.** The dataset for 19,648 soybean Plant Introductions genotyped with the SoySNP50K BeadChip is available at SoyBase, the USDA-ARS Soybean Genetics and Genomics Database (<http://soybase.org/snps/download.php>).

**Correspondence author:** Qijian Song, Soybean Genomics and Improvement Laboratory, Beltsville Agricultural Research Center – West, USDA, ARS, Beltsville, MD 20705-2350. Tel: 301-504-5723, e-mail: [Qijian.Song@ars.usda.gov](mailto:Qijian.Song@ars.usda.gov)

DOI: 10.1534/g3.115.019000

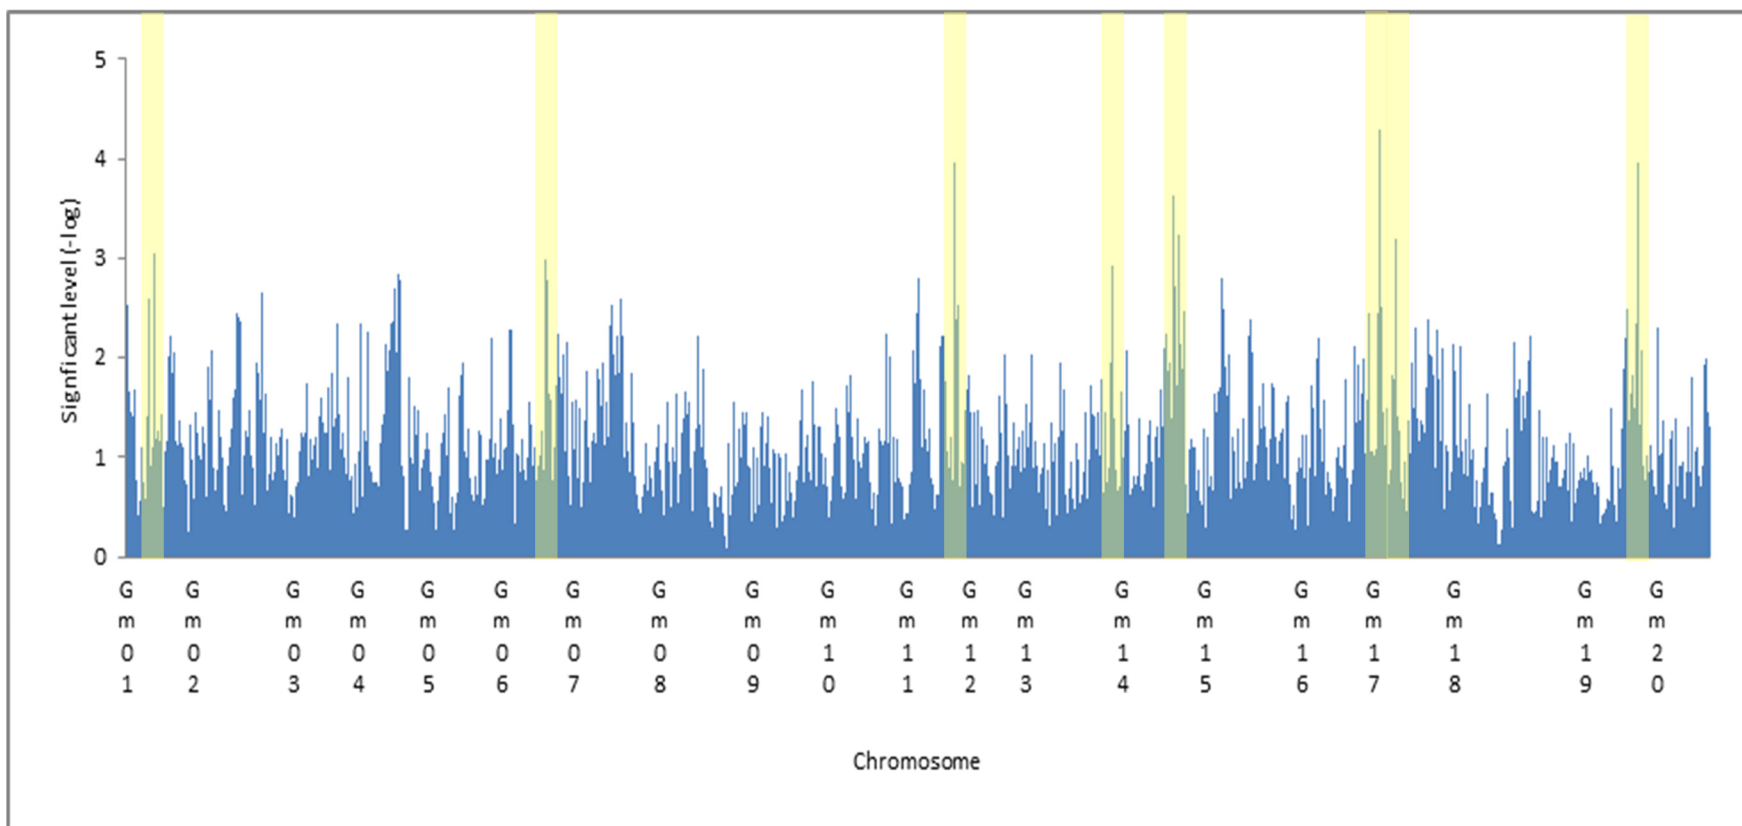

**Figure S1** Significance level of genome-wide association of seed weight with SNP loci. Manhattan plot of the negative logarithm of the association P values of SNPs across the 20 soybean chromosomes (Gm01-Gm20) with soybean seed size. The genome positions of eight significant associations are highlighted in yellow.

## Tables S1-S4

Available for download as Excel files at [www.g3journal.org/lookup/suppl/doi:10.1534/g3.115.019000/-/DC1](http://www.g3journal.org/lookup/suppl/doi:10.1534/g3.115.019000/-/DC1)

**Table S1 Description of 19,648 *Glycine max* and *G. soja* accessions genotyped with the SoySNP50K BeadChip.** Data include the PI (Plant Introduction) number, Species (*G. max* vs. *G. soja*), Country of origin, Cultivar name if applicable, Maturity Group, 99.9% similar to another accession (Y/N), Landrace or North American Elite cultivars used for analysis and seed weight of accessions used in the association analysis of seed weight.

**Table S2 Positions of haplotype blocks in the 806 wild soybean (*G. soja*) accessions.** Data include the chromosome, the bp start and end positions of the haplotype block, the size in kbp of the haplotype block and the number of SNPs in the haplotype block based on the Glyma 1.01 genome assembly.

**Table S3 Positions of haplotype blocks in the 5,396 landrace accessions.** Data include the chromosome, the bp start and end positions of the haplotype block, the size in kbp of the haplotype block and the number of SNPs in the haplotype block based on the Glyma1.01 genome assembly.

**Table S4 Positions of haplotype blocks in the 562 North American cultivars.** Data include the chromosome, the bp start and end positions of the haplotype block, the size in kbp of the haplotype block, the number of SNPs in the haplotype block based on the Glyma1.01 genome assembly.

**Table S5 Haplotype block sharing among wild, landrace and North American cultivar populations**

|                     | Number of common SNPs in pair-wise population comparisons | Non-concordant pairs | Concordant pairs | Haplotype block sharing (%) |
|---------------------|-----------------------------------------------------------|----------------------|------------------|-----------------------------|
| Wild vs. landrace   | 11692                                                     | 2028                 | 17879            | 89.8                        |
| Wild vs. N. Am.     | 10101                                                     | 1666                 | 15955            | 90.5                        |
| Landrace vs. N. Am. | 21081                                                     | 13121                | 67391            | 83.7                        |

**Table S6 The distribution of haplotype block numbers and their frequencies in the euchromatic and heterochromatic regions of the wild, landrace and North American cultivar populations**

| Frequency     | Euchromatic regions |              |            | Heterochromatic Regions |              |           |
|---------------|---------------------|--------------|------------|-------------------------|--------------|-----------|
|               | Wild(%)             | Landrace (%) | N. Am.(%)  | Wild(%)                 | Landrace (%) | N. Am.(%) |
| ≤0.1          | 3412 (23.8)         | 5850(33.2)   | 3177(32.6) | 681(44.4)               | 825(43.1)    | 354(30.0) |
| >0.1 and ≤0.2 | 2941(20.5)          | 3242(18.4)   | 1508(15.5) | 314(20.5)               | 369(19.3)    | 184(15.6) |
| >0.2 and ≤0.3 | 2116(14.7)          | 2121(12.0)   | 1287(13.2) | 193(12.6)               | 211(11.0)    | 150(12.7) |
| >0.3 and ≤0.4 | 1471(10.2)          | 1694(9.6)    | 957(9.8)   | 144(9.4)                | 102(5.3)     | 167(14.2) |
| >0.4 and ≤0.5 | 1280(8.9)           | 1392(7.9)    | 793(8.1)   | 74(4.8)                 | 71(3.7)      | 98(8.3)   |
| >0.5 and ≤0.6 | 1084(7.6)           | 1129(6.4)    | 664(6.8)   | 68(4.4)                 | 95(5.0)      | 98(8.3)   |
| >0.6 and ≤0.7 | 894(6.2)            | 845(4.8)     | 553(5.7)   | 37(2.4)                 | 78(4.1)      | 70(5.9)   |
| >0.7 and ≤0.8 | 716(5.0)            | 670(3.8)     | 434(4.4)   | 14(0.9)                 | 55(2.9)      | 34(2.9)   |
| >0.8 and ≤0.9 | 336(2.3)            | 522(3.0)     | 314(3.2)   | 8(0.5)                  | 89(4.7)      | 17(1.4)   |
| >0.9 and <1.0 | 106(0.7)            | 152(0.9)     | 66(0.7)    | 1(0.1)                  | 17(0.9)      | 8(0.7)    |

**Table S7 Observed and expected number of genes in the haplotype blocks of euchromatic and heterochromatic regions based on the assumption of 38,381 genes in euchromatic and 8,059 genes in heterochromatic regions**

| Population  | Euchromatic regions in haplotype blocks |                                                                                           | Heterochromatic regions in haplotype blocks |                                                                                               |
|-------------|-----------------------------------------|-------------------------------------------------------------------------------------------|---------------------------------------------|-----------------------------------------------------------------------------------------------|
|             | Observed number of genes                | Expected number of genes based on proportion of euchromatic regions in blocks genome-wide | Observed number of genes                    | Expected number of genes based on proportion of heterochromatic regions in blocks genome-wide |
| Wild        | 3587                                    | 3818                                                                                      | 1496                                        | 2498                                                                                          |
| Landrace    | 16294                                   | 15654                                                                                     | 4082                                        | 4594                                                                                          |
| N. Am.      | 18629                                   | 18327                                                                                     | 3397                                        | 3627                                                                                          |
| Genome-wide | 38381                                   |                                                                                           | 8059                                        |                                                                                               |

**Table S8 Observed and expected total recombination rate in the haplotype blocks of euchromatic and heterochromatic regions based on the genetic linkage map length of the Williams 82 ×PI479752 RIL population**

| Population      | Total genetic distance in haplotype blocks (cM) | Euchromatic Regions                            |                                     |                                                    | Heterochromatic Regions                            |                                     |                                                    |
|-----------------|-------------------------------------------------|------------------------------------------------|-------------------------------------|----------------------------------------------------|----------------------------------------------------|-------------------------------------|----------------------------------------------------|
|                 |                                                 | Recombination rate in haplotype blocks (cM/Mb) | Expected recombination rate (cM/Mb) | Observed vs. expected total recombination rate (%) | Recombination rate in the haplotype blocks (cM/Mb) | Expected recombination rate (cM/Mb) | Observed vs. expected total recombination rate (%) |
| Wild            | 34.6                                            | 0.60                                           | 4.86                                | 12.3                                               | 0.05                                               | 0.37                                | 12.4                                               |
| Landrace        | 377.9                                           | 1.81                                           | 4.86                                | 37.3                                               | 0.13                                               | 0.37                                | 34.1                                               |
| N. Am. cultivar | 653.3                                           | 1.90                                           | 4.86                                | 39.1                                               | 0.15                                               | 0.37                                | 41.3                                               |

**Table S9  $F_{ST}$  of Wild versus landrace populations and landrace versus North American cultivar populations at 42,449 SNP loci across the 20 soybean chromosomes**

Available for download as an Excel file at [www.g3journal.org/lookup/suppl/doi:10.1534/g3.115.019000/-/DC1](http://www.g3journal.org/lookup/suppl/doi:10.1534/g3.115.019000/-/DC1)



**Table S10 Average  $F_{st}$  and proportion of loci with  $F_{st}$  significant at the 5% probability level in wild vs. landrace and in landrace vs. North American cultivar populations in the 20 chromosomes**

| Chr         | $F_{st}$ wild vs. landrace | Standard deviation of $F_{st}$ wild vs. landrace | $F_{st}$ landrace vs. N. Am. | Standard deviation of $F_{st}$ landrace vs. N. Am. | Proportion of loci with $F_{st}$ significant at the 5% level wild vs. landrace (%) | Proportion of loci with $F_{st}$ significant at the 5% level landrace vs. N. Am. (%) |
|-------------|----------------------------|--------------------------------------------------|------------------------------|----------------------------------------------------|------------------------------------------------------------------------------------|--------------------------------------------------------------------------------------|
| Gm01        | 0.257                      | 0.252                                            | 0.100                        | 0.140                                              | 7.79                                                                               | 5.25                                                                                 |
| Gm02        | 0.229                      | 0.229                                            | 0.079                        | 0.116                                              | 5.36                                                                               | 3.86                                                                                 |
| Gm03        | 0.194                      | 0.229                                            | 0.106                        | 0.131                                              | 5.51                                                                               | 4.74                                                                                 |
| Gm04        | 0.225                      | 0.233                                            | 0.115                        | 0.186                                              | 4.98                                                                               | 8.52                                                                                 |
| Gm05        | 0.261                      | 0.278                                            | 0.060                        | 0.096                                              | 10.54                                                                              | 2.21                                                                                 |
| Gm06        | 0.221                      | 0.234                                            | 0.151                        | 0.192                                              | 4.96                                                                               | 13.09                                                                                |
| Gm07        | 0.224                      | 0.239                                            | 0.074                        | 0.107                                              | 6.49                                                                               | 1.74                                                                                 |
| Gm08        | 0.248                      | 0.245                                            | 0.119                        | 0.157                                              | 6.53                                                                               | 9.40                                                                                 |
| Gm09        | 0.213                      | 0.222                                            | 0.097                        | 0.132                                              | 4.43                                                                               | 4.05                                                                                 |
| Gm10        | 0.252                      | 0.251                                            | 0.111                        | 0.147                                              | 7.10                                                                               | 6.20                                                                                 |
| Gm11        | 0.274                      | 0.256                                            | 0.089                        | 0.131                                              | 8.93                                                                               | 4.33                                                                                 |
| Gm12        | 0.315                      | 0.291                                            | 0.127                        | 0.187                                              | 14.05                                                                              | 10.82                                                                                |
| Gm13        | 0.224                      | 0.244                                            | 0.126                        | 0.171                                              | 6.70                                                                               | 9.93                                                                                 |
| Gm14        | 0.232                      | 0.239                                            | 0.086                        | 0.106                                              | 6.87                                                                               | 1.93                                                                                 |
| Gm15        | 0.211                      | 0.218                                            | 0.080                        | 0.101                                              | 3.41                                                                               | 2.63                                                                                 |
| Gm16        | 0.171                      | 0.202                                            | 0.140                        | 0.178                                              | 3.18                                                                               | 12.48                                                                                |
| Gm17        | 0.203                      | 0.221                                            | 0.095                        | 0.119                                              | 3.99                                                                               | 3.84                                                                                 |
| Gm18        | 0.174                      | 0.189                                            | 0.075                        | 0.121                                              | 1.59                                                                               | 3.54                                                                                 |
| Gm19        | 0.269                      | 0.259                                            | 0.157                        | 0.170                                              | 8.85                                                                               | 11.86                                                                                |
| Gm20        | 0.257                      | 0.272                                            | 0.098                        | 0.142                                              | 10.32                                                                              | 4.71                                                                                 |
| <b>Mean</b> | <b>0.230</b>               | <b>0.242</b>                                     | <b>0.110</b>                 | <b>0.147</b>                                       | <b>6.579</b>                                                                       | <b>6.257</b>                                                                         |

**Table S11 SNPs significantly associated with seed weight and the seed weight QTL previously reported in similar regions based upon QTL analysis**

| Chromosome | Position (bp) | SNP               | Significance level (-log(p)) | Linkage Group | Previously reported QTL *                                                       | Markers associated with previously reported QTL             |
|------------|---------------|-------------------|------------------------------|---------------|---------------------------------------------------------------------------------|-------------------------------------------------------------|
| 1          | 32259879      | Gm01_32259879_A_G | 3.1                          | D1a           |                                                                                 |                                                             |
| 6          | 19735501      | Gm06_19735501_A_G | 3.0                          | C2            | Sd wt 2-2<br>Sd wt 6-5<br>Sd wt 15-1                                            | A635_1<br>Satt277<br>Satt277                                |
| 11         | 28275032      | Gm11_28275032_T_C | 3.7                          | B1            | Sd wt 10-3                                                                      | Sat_095                                                     |
| 11         | 28383645      | Gm11_28383645_A_G | 3.4                          | B1            |                                                                                 |                                                             |
| 11         | 28631552      | Gm11_28631552_A_G | 3.8                          | B1            |                                                                                 |                                                             |
| 11         | 30066578      | Gm11_30066578_A_G | 4.0                          | B1            |                                                                                 |                                                             |
| 13         | 38442998      | Gm13_38442998_C_T | 2.9                          | F             | Sd wt 35-10                                                                     | Satt502-<br>Satt383                                         |
| 14         | 28503986      | Gm14_28503986_G_T | 3.4                          | B2            | Sd wt 10-4<br>Sd wt 13-3                                                        | BLT057_2<br>Satt070                                         |
| 14         | 28527246      | Gm14_28527246_T_C | 3.6                          | B2            |                                                                                 |                                                             |
| 14         | 28574821      | Gm14_28574821_A_G | 3.6                          | B2            |                                                                                 |                                                             |
| 14         | 29397454      | Gm14_29397454_A_C | 3.0                          | B2            |                                                                                 |                                                             |
| 14         | 34265654      | Gm14_34265654_T_C | 3.2                          | B2            |                                                                                 |                                                             |
| 17         | 2415553       | Gm17_2415553_G_A  | 3.1                          | D2            | Sd wt 3-1<br>Sd wt 13-5<br>Sd wt 14-1<br>Sd wt 18-2<br>Sd wt 21-2<br>Sd wt 22-3 | A257_1<br>Satt154<br>Satt014<br>Satt002<br>B146_1<br>B146_1 |
| 17         | 2420297       | Gm17_2420297_T_C  | 3.4                          | D2            |                                                                                 |                                                             |
| 17         | 2425781       | Gm17_2425781_T_C  | 3.5                          | D2            |                                                                                 |                                                             |
| 17         | 2429917       | Gm17_2429917_T_G  | 3.6                          | D2            |                                                                                 |                                                             |
| 17         | 2431342       | Gm17_2431342_T_G  | 3.4                          | D2            |                                                                                 |                                                             |
| 17         | 2437182       | Gm17_2437182_A_C  | 3.5                          | D2            |                                                                                 |                                                             |
| 17         | 2437767       | Gm17_2437767_C_A  | 3.4                          | D2            |                                                                                 |                                                             |
| 17         | 2444576       | Gm17_2444576_A_G  | 3.2                          | D2            |                                                                                 |                                                             |
| 17         | 2500016       | Gm17_2500016_T_C  | 4.3                          | D2            |                                                                                 |                                                             |
| 17         | 2500333       | Gm17_2500333_T_G  | 4.2                          | D2            |                                                                                 |                                                             |
| 17         | 8735403       | Gm17_8735403_G_A  | 3.2                          | D2            |                                                                                 |                                                             |
| 17         | 8818072       | Gm17_8818072_A_C  | 3.1                          | D2            |                                                                                 |                                                             |
| 17         | 8827651       | Gm17_8827651_C_T  | 3.1                          | D2            |                                                                                 |                                                             |
| 19         | 42791352      | Gm19_42791352_T_C | 3.0                          | L             | Sd wt 5-1<br>Sd wt 7-7<br>Sd wt 15-7<br>Sd wt 17-1                              | Satt527<br>Sat_099<br>Satt113<br>Satt156                    |
| 19         | 42812863      | Gm19_42812863_T_C | 3.5                          | L             |                                                                                 |                                                             |
| 19         | 43013222      | Gm19_43013222_C_A | 4.0                          | L             |                                                                                 |                                                             |
| 19         | 43030068      | Gm19_43030068_A_G | 3.9                          | L             |                                                                                 |                                                             |
| 19         | 43117852      | Gm19_43117852_A_C | 3.8                          | L             |                                                                                 |                                                             |

\* QTL names are those assigned by SoyBase (<http://www.soybase.org/>)

Sd wt 2-2/Sd wt 3-1: Mian et al. 1996. Theor. Appl. Genet 93:1011-1016.  
Sd wt 5-1/Sd wt 6-5/Sd wt 7-7: Orf et al. 1999. Crop Sci. 39(6):1624-1651.  
Sd wt 10-3/Sd wt 10-4: Specht et al. 2001. Crop Sci. 41(2):493-509

Sd wt 13-3/Sd wt 13-5: Hoeck et al. 2003. *Crop Sci.* 43(1):68-74  
Sd wt 14-1: Chapman et al. 2003 *Euphytica* 129(3):387-393  
Sd wt 15-1/Sd wt 15-7: Hyten et al. 2004. *Theor. Appl. Genet.* 109(3):552-561  
Sd wt 17-1: Stombaugh et al. 2004 *Crop Sci.* 44:2101-2106  
Sd wt 18-2: Panthee et al. 2005 *Crop Sci.* 45(5):2015-2022  
Sd wt 21-2: Gai et al. 2007 *Front. of Ag. in China* 1(1):1-7  
Sd wt 22-3: Zhang et al, 2004 *Theor. Appl. Genet.* 108:1131-1139  
Sd wt 35-10: Han et al. 2012 *Theor. Appl. Genet.* 125 (4):671-683.
