# Supplementary material for: Fingerprinting Soybean Germplasm and Its Utility in Genomic Research
Source: PubMed Central journal article supplement (PMC4592982; doi:10.1534/g3.115.019000), 2015-07-28
Supplement: supp_g3.115.019000_FigureS1.pdf [file supp_g3.115.019000_FigureS1.pdf]

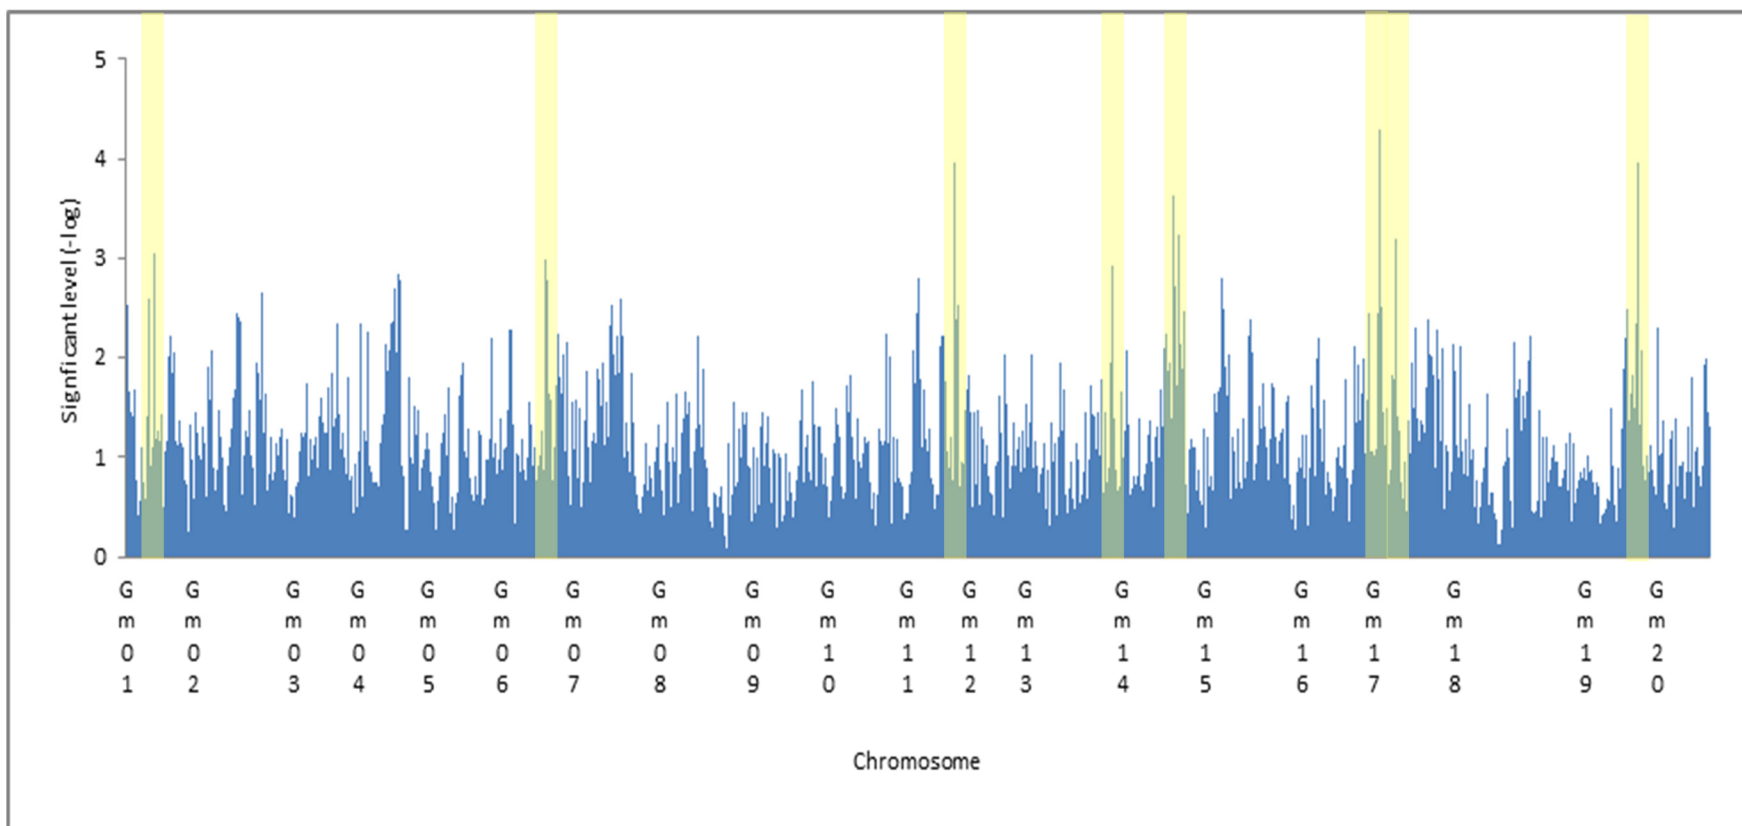

**Figure S1** Significance level of genome-wide association of seed weight with SNP loci. Manhattan plot of the negative logarithm of the association P values of SNPs across the 20 soybean chromosomes (Gm01-Gm20) with soybean seed size. The genome positions of eight significant associations are highlighted in yellow.
