# Supplementary material for: Fingerprinting Soybean Germplasm and Its Utility in Genomic Research
Source: PubMed Central journal article supplement (PMC4592982; doi:10.1534/g3.115.019000), 2015-07-28
Supplement: supp_g3.115.019000_TableS5.pdf [file supp_g3.115.019000_TableS5.pdf]

**Table S5 Haplotype block sharing among wild, landrace and North American cultivar populations**

|                     | Number of common SNPs in pair-wise population comparisons | Non-concordant pairs | Concordant pairs | Haplotype block sharing (%) |
|---------------------|-----------------------------------------------------------|----------------------|------------------|-----------------------------|
| Wild vs. landrace   | 11692                                                     | 2028                 | 17879            | 89.8                        |
| Wild vs. N. Am.     | 10101                                                     | 1666                 | 15955            | 90.5                        |
| Landrace vs. N. Am. | 21081                                                     | 13121                | 67391            | 83.7                        |
