# Supplementary material for: Fingerprinting Soybean Germplasm and Its Utility in Genomic Research
Source: PubMed Central journal article supplement (PMC4592982; doi:10.1534/g3.115.019000), 2015-07-28
Supplement: supp_g3.115.019000_TableS6.pdf [file supp_g3.115.019000_TableS6.pdf]

**Table S6 The distribution of haplotype block numbers and their frequencies in the euchromatic and heterochromatic regions of the wild, landrace and North American cultivar populations**

| Frequency     | Euchromatic regions |              |            | Heterochromatic Regions |              |           |
|---------------|---------------------|--------------|------------|-------------------------|--------------|-----------|
|               | Wild(%)             | Landrace (%) | N. Am.(%)  | Wild(%)                 | Landrace (%) | N. Am.(%) |
| ≤0.1          | 3412 (23.8)         | 5850(33.2)   | 3177(32.6) | 681(44.4)               | 825(43.1)    | 354(30.0) |
| >0.1 and ≤0.2 | 2941(20.5)          | 3242(18.4)   | 1508(15.5) | 314(20.5)               | 369(19.3)    | 184(15.6) |
| >0.2 and ≤0.3 | 2116(14.7)          | 2121(12.0)   | 1287(13.2) | 193(12.6)               | 211(11.0)    | 150(12.7) |
| >0.3 and ≤0.4 | 1471(10.2)          | 1694(9.6)    | 957(9.8)   | 144(9.4)                | 102(5.3)     | 167(14.2) |
| >0.4 and ≤0.5 | 1280(8.9)           | 1392(7.9)    | 793(8.1)   | 74(4.8)                 | 71(3.7)      | 98(8.3)   |
| >0.5 and ≤0.6 | 1084(7.6)           | 1129(6.4)    | 664(6.8)   | 68(4.4)                 | 95(5.0)      | 98(8.3)   |
| >0.6 and ≤0.7 | 894(6.2)            | 845(4.8)     | 553(5.7)   | 37(2.4)                 | 78(4.1)      | 70(5.9)   |
| >0.7 and ≤0.8 | 716(5.0)            | 670(3.8)     | 434(4.4)   | 14(0.9)                 | 55(2.9)      | 34(2.9)   |
| >0.8 and ≤0.9 | 336(2.3)            | 522(3.0)     | 314(3.2)   | 8(0.5)                  | 89(4.7)      | 17(1.4)   |
| >0.9 and <1.0 | 106(0.7)            | 152(0.9)     | 66(0.7)    | 1(0.1)                  | 17(0.9)      | 8(0.7)    |
