# Supplementary material for: Fingerprinting Soybean Germplasm and Its Utility in Genomic Research
Source: PubMed Central journal article supplement (PMC4592982; doi:10.1534/g3.115.019000), 2015-07-28
Supplement: supp_g3.115.019000_TableS7.pdf [file supp_g3.115.019000_TableS7.pdf]

**Table S7 Observed and expected number of genes in the haplotype blocks of euchromatic and heterochromatic regions based on the assumption of 38,381 genes in euchromatic and 8,059 genes in heterochromatic regions**

| Population  | Euchromatic regions in haplotype blocks |                                                                                           | Heterochromatic regions in haplotype blocks |                                                                                               |
|-------------|-----------------------------------------|-------------------------------------------------------------------------------------------|---------------------------------------------|-----------------------------------------------------------------------------------------------|
|             | Observed number of genes                | Expected number of genes based on proportion of euchromatic regions in blocks genome-wide | Observed number of genes                    | Expected number of genes based on proportion of heterochromatic regions in blocks genome-wide |
| Wild        | 3587                                    | 3818                                                                                      | 1496                                        | 2498                                                                                          |
| Landrace    | 16294                                   | 15654                                                                                     | 4082                                        | 4594                                                                                          |
| N. Am.      | 18629                                   | 18327                                                                                     | 3397                                        | 3627                                                                                          |
| Genome-wide | 38381                                   |                                                                                           | 8059                                        |                                                                                               |
