# Supplementary material for: Fingerprinting Soybean Germplasm and Its Utility in Genomic Research
Source: PubMed Central journal article supplement (PMC4592982; doi:10.1534/g3.115.019000), 2015-07-28
Supplement: supp_g3.115.019000_TableS8.pdf [file supp_g3.115.019000_TableS8.pdf]

**Table S8 Observed and expected total recombination rate in the haplotype blocks of euchromatic and heterochromatic regions based on the genetic linkage map length of the Williams 82 ×PI479752 RIL population**

| Population      | Total genetic distance in haplotype blocks (cM) | Euchromatic Regions                            |                                     |                                                    | Heterochromatic Regions                            |                                     |                                                    |
|-----------------|-------------------------------------------------|------------------------------------------------|-------------------------------------|----------------------------------------------------|----------------------------------------------------|-------------------------------------|----------------------------------------------------|
|                 |                                                 | Recombination rate in haplotype blocks (cM/Mb) | Expected recombination rate (cM/Mb) | Observed vs. expected total recombination rate (%) | Recombination rate in the haplotype blocks (cM/Mb) | Expected recombination rate (cM/Mb) | Observed vs. expected total recombination rate (%) |
| Wild            | 34.6                                            | 0.60                                           | 4.86                                | 12.3                                               | 0.05                                               | 0.37                                | 12.4                                               |
| Landrace        | 377.9                                           | 1.81                                           | 4.86                                | 37.3                                               | 0.13                                               | 0.37                                | 34.1                                               |
| N. Am. cultivar | 653.3                                           | 1.90                                           | 4.86                                | 39.1                                               | 0.15                                               | 0.37                                | 41.3                                               |
