# Supplementary material for: Fingerprinting Soybean Germplasm and Its Utility in Genomic Research
Source: PubMed Central journal article supplement (PMC4592982; doi:10.1534/g3.115.019000), 2015-07-28
Supplement: supp_g3.115.019000_TableS10.pdf [file supp_g3.115.019000_TableS10.pdf]

**Table S10 Average  $F_{st}$  and proportion of loci with  $F_{st}$  significant at the 5% probability level in wild vs. landrace and in landrace vs. North American cultivar populations in the 20 chromosomes**

| Chr         | $F_{st}$ wild vs. landrace | Standard deviation of $F_{st}$ wild vs. landrace | $F_{st}$ landrace vs. N. Am. | Standard deviation of $F_{st}$ landrace vs. N. Am. | Proportion of loci with $F_{st}$ significant at the 5% level wild vs. landrace (%) | Proportion of loci with $F_{st}$ significant at the 5% level landrace vs. N. Am. (%) |
|-------------|----------------------------|--------------------------------------------------|------------------------------|----------------------------------------------------|------------------------------------------------------------------------------------|--------------------------------------------------------------------------------------|
| Gm01        | 0.257                      | 0.252                                            | 0.100                        | 0.140                                              | 7.79                                                                               | 5.25                                                                                 |
| Gm02        | 0.229                      | 0.229                                            | 0.079                        | 0.116                                              | 5.36                                                                               | 3.86                                                                                 |
| Gm03        | 0.194                      | 0.229                                            | 0.106                        | 0.131                                              | 5.51                                                                               | 4.74                                                                                 |
| Gm04        | 0.225                      | 0.233                                            | 0.115                        | 0.186                                              | 4.98                                                                               | 8.52                                                                                 |
| Gm05        | 0.261                      | 0.278                                            | 0.060                        | 0.096                                              | 10.54                                                                              | 2.21                                                                                 |
| Gm06        | 0.221                      | 0.234                                            | 0.151                        | 0.192                                              | 4.96                                                                               | 13.09                                                                                |
| Gm07        | 0.224                      | 0.239                                            | 0.074                        | 0.107                                              | 6.49                                                                               | 1.74                                                                                 |
| Gm08        | 0.248                      | 0.245                                            | 0.119                        | 0.157                                              | 6.53                                                                               | 9.40                                                                                 |
| Gm09        | 0.213                      | 0.222                                            | 0.097                        | 0.132                                              | 4.43                                                                               | 4.05                                                                                 |
| Gm10        | 0.252                      | 0.251                                            | 0.111                        | 0.147                                              | 7.10                                                                               | 6.20                                                                                 |
| Gm11        | 0.274                      | 0.256                                            | 0.089                        | 0.131                                              | 8.93                                                                               | 4.33                                                                                 |
| Gm12        | 0.315                      | 0.291                                            | 0.127                        | 0.187                                              | 14.05                                                                              | 10.82                                                                                |
| Gm13        | 0.224                      | 0.244                                            | 0.126                        | 0.171                                              | 6.70                                                                               | 9.93                                                                                 |
| Gm14        | 0.232                      | 0.239                                            | 0.086                        | 0.106                                              | 6.87                                                                               | 1.93                                                                                 |
| Gm15        | 0.211                      | 0.218                                            | 0.080                        | 0.101                                              | 3.41                                                                               | 2.63                                                                                 |
| Gm16        | 0.171                      | 0.202                                            | 0.140                        | 0.178                                              | 3.18                                                                               | 12.48                                                                                |
| Gm17        | 0.203                      | 0.221                                            | 0.095                        | 0.119                                              | 3.99                                                                               | 3.84                                                                                 |
| Gm18        | 0.174                      | 0.189                                            | 0.075                        | 0.121                                              | 1.59                                                                               | 3.54                                                                                 |
| Gm19        | 0.269                      | 0.259                                            | 0.157                        | 0.170                                              | 8.85                                                                               | 11.86                                                                                |
| Gm20        | 0.257                      | 0.272                                            | 0.098                        | 0.142                                              | 10.32                                                                              | 4.71                                                                                 |
| <b>Mean</b> | <b>0.230</b>               | <b>0.242</b>                                     | <b>0.110</b>                 | <b>0.147</b>                                       | <b>6.579</b>                                                                       | <b>6.257</b>                                                                         |
