# Supplementary material for: Fingerprinting Soybean Germplasm and Its Utility in Genomic Research
Source: PubMed Central journal article supplement (PMC4592982; doi:10.1534/g3.115.019000), 2015-07-28
Supplement: supp_g3.115.019000_TableS11.pdf [file supp_g3.115.019000_TableS11.pdf]

**Table S11 SNPs significantly associated with seed weight and the seed weight QTL previously reported in similar regions based upon QTL analysis**

| Chromosome | Position (bp) | SNP               | Significance level (-log(p)) | Linkage Group | Previously reported QTL *                                                       | Markers associated with previously reported QTL             |
|------------|---------------|-------------------|------------------------------|---------------|---------------------------------------------------------------------------------|-------------------------------------------------------------|
| 1          | 32259879      | Gm01_32259879_A_G | 3.1                          | D1a           |                                                                                 |                                                             |
| 6          | 19735501      | Gm06_19735501_A_G | 3.0                          | C2            | Sd wt 2-2<br>Sd wt 6-5<br>Sd wt 15-1                                            | A635_1<br>Satt277<br>Satt277                                |
| 11         | 28275032      | Gm11_28275032_T_C | 3.7                          | B1            | Sd wt 10-3                                                                      | Sat_095                                                     |
| 11         | 28383645      | Gm11_28383645_A_G | 3.4                          | B1            |                                                                                 |                                                             |
| 11         | 28631552      | Gm11_28631552_A_G | 3.8                          | B1            |                                                                                 |                                                             |
| 11         | 30066578      | Gm11_30066578_A_G | 4.0                          | B1            |                                                                                 |                                                             |
| 13         | 38442998      | Gm13_38442998_C_T | 2.9                          | F             | Sd wt 35-10                                                                     | Satt502-<br>Satt383                                         |
| 14         | 28503986      | Gm14_28503986_G_T | 3.4                          | B2            | Sd wt 10-4<br>Sd wt 13-3                                                        | BLT057_2<br>Satt070                                         |
| 14         | 28527246      | Gm14_28527246_T_C | 3.6                          | B2            |                                                                                 |                                                             |
| 14         | 28574821      | Gm14_28574821_A_G | 3.6                          | B2            |                                                                                 |                                                             |
| 14         | 29397454      | Gm14_29397454_A_C | 3.0                          | B2            |                                                                                 |                                                             |
| 14         | 34265654      | Gm14_34265654_T_C | 3.2                          | B2            |                                                                                 |                                                             |
| 17         | 2415553       | Gm17_2415553_G_A  | 3.1                          | D2            | Sd wt 3-1<br>Sd wt 13-5<br>Sd wt 14-1<br>Sd wt 18-2<br>Sd wt 21-2<br>Sd wt 22-3 | A257_1<br>Satt154<br>Satt014<br>Satt002<br>B146_1<br>B146_1 |
| 17         | 2420297       | Gm17_2420297_T_C  | 3.4                          | D2            |                                                                                 |                                                             |
| 17         | 2425781       | Gm17_2425781_T_C  | 3.5                          | D2            |                                                                                 |                                                             |
| 17         | 2429917       | Gm17_2429917_T_G  | 3.6                          | D2            |                                                                                 |                                                             |
| 17         | 2431342       | Gm17_2431342_T_G  | 3.4                          | D2            |                                                                                 |                                                             |
| 17         | 2437182       | Gm17_2437182_A_C  | 3.5                          | D2            |                                                                                 |                                                             |
| 17         | 2437767       | Gm17_2437767_C_A  | 3.4                          | D2            |                                                                                 |                                                             |
| 17         | 2444576       | Gm17_2444576_A_G  | 3.2                          | D2            |                                                                                 |                                                             |
| 17         | 2500016       | Gm17_2500016_T_C  | 4.3                          | D2            |                                                                                 |                                                             |
| 17         | 2500333       | Gm17_2500333_T_G  | 4.2                          | D2            |                                                                                 |                                                             |
| 17         | 8735403       | Gm17_8735403_G_A  | 3.2                          | D2            |                                                                                 |                                                             |
| 17         | 8818072       | Gm17_8818072_A_C  | 3.1                          | D2            |                                                                                 |                                                             |
| 17         | 8827651       | Gm17_8827651_C_T  | 3.1                          | D2            |                                                                                 |                                                             |
| 19         | 42791352      | Gm19_42791352_T_C | 3.0                          | L             | Sd wt 5-1<br>Sd wt 7-7<br>Sd wt 15-7<br>Sd wt 17-1                              | Satt527<br>Sat_099<br>Satt113<br>Satt156                    |
| 19         | 42812863      | Gm19_42812863_T_C | 3.5                          | L             |                                                                                 |                                                             |
| 19         | 43013222      | Gm19_43013222_C_A | 4.0                          | L             |                                                                                 |                                                             |
| 19         | 43030068      | Gm19_43030068_A_G | 3.9                          | L             |                                                                                 |                                                             |
| 19         | 43117852      | Gm19_43117852_A_C | 3.8                          | L             |                                                                                 |                                                             |

\* QTL names are those assigned by SoyBase (<http://www.soybase.org/>)

Sd wt 2-2/Sd wt 3-1: Mian et al. 1996. Theor. Appl. Genet 93:1011-1016.  
Sd wt 5-1/Sd wt 6-5/Sd wt 7-7: Orf et al. 1999. Crop Sci. 39(6):1624-1651.  
Sd wt 10-3/Sd wt 10-4: Specht et al. 2001. Crop Sci. 41(2):493-509

Sd wt 13-3/Sd wt 13-5: Hoeck et al. 2003. *Crop Sci.* 43(1):68-74  
Sd wt 14-1: Chapman et al. 2003 *Euphytica* 129(3):387-393  
Sd wt 15-1/Sd wt 15-7: Hyten et al. 2004. *Theor. Appl. Genet.* 109(3):552-561  
Sd wt 17-1: Stombaugh et al. 2004 *Crop Sci.* 44:2101-2106  
Sd wt 18-2: Panthee et al. 2005 *Crop Sci.* 45(5):2015-2022  
Sd wt 21-2: Gai et al. 2007 *Front. of Ag. in China* 1(1):1-7  
Sd wt 22-3: Zhang et al, 2004 *Theor. Appl. Genet.* 108:1131-1139  
Sd wt 35-10: Han et al. 2012 *Theor. Appl. Genet.* 125 (4):671-683.
